# Supplementary material for: Cascading epigenomic analysis for identifying disease genes from the regulatory landscape of GWAS variants
Source: PLOS journal article supplement (doi:10.1371/journal.pgen.1009918), 2021-11-22
Supplement: S8 (10.1371/journal.pgen.1009918.s008) [file journal.pgen.1009918.s008]

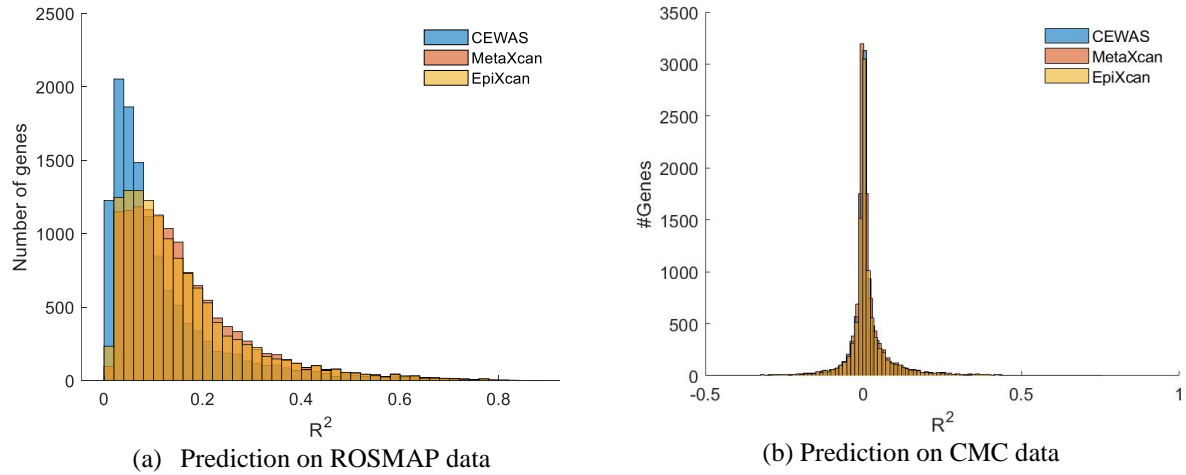

**S2 Fig.  $R^2$  of gene models.** (a)  $R^2$  estimated by correlating the predicted and measured expression levels in ROSMAP. CEWAS attained lower  $R^2$  as expected, since CEWAS is designed to extract a specific component of gene expression, namely the epigenomic component that is driven by genetic effects. In contrast, MetaXcan and EpiXcan are optimized for predicting gene expression. (b)  $R^2$  estimated by applying ROSMAP models to CMC genotype data and correlating the predicted expression levels with that measured in CMC.  $R^2$  appears similar across methods, but CEWAS actually attained slightly lower  $R^2$  if we zoom into the results (see Fig S3).
